1 **Title: Augmenting propulsion demands during split-belt walking increases**  
2 **locomotor adaptation in the asymmetric motor system**

3

4 **Authors:** Carly J. Sombric, Ph.D.<sup>1</sup>, Gelsy Torres-Oviedo, Ph.D.<sup>1</sup>

5 <sup>1</sup>Department of Bioengineering, University of Pittsburgh, Pittsburgh, PA, United States

6

7 **Corresponding Author:**

8 Dr. Gelsy Torres-Oviedo

9 Department of Bioengineering

10 4420 Bayard Street

11 Suite 110, Pitt

12 Pittsburgh, PA 15213

13 University of Pittsburgh

14 gelsyto@pitt.edu

15

16 **Keywords:** gait, locomotion, kinematics, kinetics, stroke, motor learning,  
17 neurorehabilitation, hemiparesis

18 **Abstract**

19

20 **Background:**

21 We previously found that increasing propulsion demands during split-belt walking (i.e.,  
22 legs moving at different speeds) facilitates locomotor adaptation. There is a clinical  
23 interest to determine if this is also the case in stroke survivors.

24

25 **Objective:**

26 We investigated the effect of propulsion forces on locomotor adaptation during and after  
27 split-belt walking in the asymmetric motor system post-stroke.

28

29 **Methods:**

30 To test this, 12 chronic stroke subjects experienced a split-belt protocol in a flat and  
31 incline session so as to contrast the effects of two different propulsion demands. Step  
32 length asymmetry and propulsion forces were used to compare the motor behavior  
33 between the two sessions because these are clinically relevant measures that are altered  
34 by split-belt walking.

35

36 **Results:**

37 The incline session resulted in more adaptation (i.e., less limping) during late split-belt  
38 walking and larger after-effects following split-belt walking. In both testing sessions,  
39 stroke subjects adapted to regain speed and slope-specific leg orientations similarly to

40 younger adults. These leg orientations achieved during split-belt walking were predictive  
41 of the post-adaptation behavior.

42

### 43 **Conclusion:**

44 These results indicated that the asymmetric motor system post-stroke can adapt to meet  
45 leg-specific kinetic demands. This promising finding suggests that augmenting  
46 propulsion demands during split-belt walking could favor symmetric walking in stroke  
47 survivors, perhaps making split-belt interventions a more effective gait rehabilitation  
48 strategy.

49

### 50 **Introduction**

51

52 Brain lesions, such as stroke, may result in asymmetric gait (i.e., limp). Post-  
53 stroke disability is largely due to such gait impairments, which may be why improving  
54 walking is the most common goal of stroke survivors (Jørgensen et al., 1995). It is of  
55 clinical interest to reduce post-stroke gait asymmetry because it can lead to comorbidities  
56 affecting mobility such as musculoskeletal injuries (Jørgensen et al., 2000) and joint pain  
57 (Patterson et al., 2012). Promising studies show that split-belt walking, in which the legs  
58 move at different speeds, could correct gait asymmetries post-stroke (Reisman et al.,  
59 2007, 2009). However, it is not effective in all individuals (Reisman et al., 2013). It has  
60 been suggested that each subject's baseline asymmetries are a factor limiting their ability  
61 to adjust their gait (Malone and Bastian, 2014), raising the question of whether locomotor  
62 adaptation could be increased in this clinical population.

63           Our previous work indicates that locomotor adaptation in young, healthy subjects  
64 increases by augmenting propulsion demands during split-belt walking. More  
65 specifically, we found that baseline kinetic demands were predictive of step lengths at  
66 steady state and after-effects, such that greater propulsion demands led to more  
67 adaptation and larger after-effects in every individual (Sombric et al., 2019). It is unclear  
68 if the same could be observed post-stroke given their known propulsion deficits  
69 (Balasubramanian et al., 2007; Bowden et al., 2006). However, it has been shown that  
70 stroke survivors can augment their propulsion forces when required by the task (Awad et  
71 al., 2014; Hsiao et al., 2015, 2016; Kesar et al., 2011; Reisman et al., 2013). Thus, we  
72 tested whether locomotor adaptation in stroke survivors could be augmented by  
73 increasing propulsion demands with inclined split-belt walking.

74           We hypothesized that increasing propulsion demands would lead to more  
75 adaptation and after-effects following split-belt walking in stroke survivors. To this end  
76 stroke subjects experienced a split-belt adaptation protocol both in a flat and incline  
77 environment that had different propulsion demands (Lay et al., 2006, 2007). We  
78 expected that stroke subjects' gait adaptation and recalibration would be augmented by  
79 incline split-belt walking relative to flat split-belt walking. We also anticipated that that  
80 the adaptation and recalibration would be achieved through similar unilateral changes to  
81 one step length during adaptation and the other step length following adaptation. These  
82 changes in step length were expected to be achieved by recovering speed and slope-  
83 specific baseline leg orientations. These anticipated findings would suggest that therapies  
84 increasing propulsion demands during walking would be a good strategy for improving  
85 post-stroke gait.

## 86 Methods

87

88 We investigated the effect of augmenting propulsion demands during split-belt  
89 walking on gait adaptation under distinct slopes (i.e., flat and incline), which naturally  
90 increase propulsion forces (Lay et al., 2006, 2007). To this end, we evaluated the  
91 adaptation and after-effects of 12 stroke patients (8 male and 4 female, 61.1 +/- 10.6  
92 years of age) in the chronic phase of recovery (>6 months post-stroke) during separate  
93 flat and incline testing sessions. Stroke subjects were eligible if they (1) had only  
94 unilateral and supratentorial lesions (i.e., without brainstem or cerebellar lesion) as  
95 confirmed by MRI, (2) were able to walk without assistance for 5 minutes at a self-  
96 selected pace, (3) were free of orthopedic injury or pain that would interfere with testing,  
97 (4) had no other neurological condition other than stroke, (5) had no severe cognitive  
98 impairments defined by a mini mental state exam score below 24, (6) could perform  
99 moderate intensity exercise, and (7) did not take medications that altered cognitive  
100 function. Written and informed consent was obtained from all participants prior to  
101 participation. The University of Pittsburgh Institutional Review Board approved the used  
102 experimental protocol, which conformed to the standards set by the Declaration of  
103 Helsinki except for registration in the database.

104

105

106 **Table 1. Clinical characteristics of stroke survivors**

| <b>ID</b>  | <b>Age</b> | <b>Gender</b> | <b>Affected Side</b> | <b>Lesion Location</b>                                | <b>Fugl-Meyer Score</b> | <b>Mid Speed (m/s)</b> | <b>Adapt Strides (flat/incline)</b> | <b>Post Strides (flat/incline)</b> | <b>Incline Session Slope (°)</b> |
|------------|------------|---------------|----------------------|-------------------------------------------------------|-------------------------|------------------------|-------------------------------------|------------------------------------|----------------------------------|
| <b>P1</b>  | 43         | Female        | R                    | Left MCA and basal ganglia                            | 33                      | 1.13                   | 907/609                             | 605/303                            | 8.5°                             |
| <b>P2</b>  | 64         | Female        | R                    | Left MCA and ACA, temporal lobe, basal ganglia        | 26                      | 0.81                   | 867/301                             | 642/300                            | 5°                               |
| <b>P3</b>  | 64         | Female        | R                    | Left MCA, frontal, parietal lobe and basal ganglia    | 29                      | 0.60                   | 617/368                             | 307/10                             | 5°                               |
| <b>P4</b>  | 58         | Female        | R                    | Left medial, frontal and parietal area's              | 21                      | 0.45                   | 901/406                             | 625/10                             | 5°                               |
| <b>P5</b>  | 66         | Male          | R                    | Left MCA, frontal, temporal and parietal lobes        | 30                      | 0.77                   | 606/452                             | 599/302                            | 5°                               |
| <b>P6</b>  | 60         | Female        | R                    | Left frontal                                          | 26                      | 0.9                    | 907/597                             | 600/300                            | 5°                               |
| <b>P7</b>  | 77         | Male          | R                    | Thalamus                                              | 30                      | 0.35                   | 589/605                             | 598/302                            | 5°                               |
| <b>P8</b>  | 59         | Male          | R                    | Left MCA                                              | 32                      | 0.7                    | 905/608                             | 600/306                            | 8.5°                             |
| <b>P9</b>  | 52         | Male          | R                    | Left MCA                                              | 32                      | 0.96                   | 903/602                             | 603/302                            | 5°                               |
| <b>P10</b> | 66         | Male          | L                    | Right frontal superior, parietal and posterior area's | 29                      | 0.76                   | 908/519                             | 602/299                            | 8.5°                             |
| <b>P11</b> | 75         | Male          | R                    | Left periventricular, temporal and basal ganglia      | 32                      | 0.94                   | 913/497                             | 552/306                            | 5°                               |
| <b>P12</b> | 49         | Male          | R                    | Frontotemporal parietal                               | 33                      | 0.71                   | 931/450                             | 303/300                            | 5°                               |

107

## 108 **2.1 General Paradigm**

109

110 All subjects experienced a split-belt protocol while either walking flat or incline  
111 throughout two separate experimental sessions (Figure 1A). The flat session was always  
112 performed first. The protocol was tailored (i.e., slope, duration, and speed) so that each  
113 subject could complete both testing sessions at the same walking speed. The subject-  
114 specific walking speed on the treadmill was determined by subtracting 0.35 m/s from  
115 each subject's overground walking speed during a Six-Minute Walking Test (Rikli and  
116 Jones, 1998). We selected this procedure since it leads to treadmill walking speeds that  
117 participants of similar age ranges to our population can sustain during long durations of  
118 the split-belt walking condition (Iturralde and Torres-Oviedo, 2019). Treadmill walking  
119 speed, labeled as Mid speed, for each participant is presented in Table 1. The speeds  
120 experienced during split-belt walking were selected based on subject's mid walking  
121 speed. The slow speed was defined as 66.6% of the medium speed, and the fast speed as  
122 133.3% of the same. In this way, the average belt-speed during split-belt walking  
123 matched that of baseline and washout, and the belt-speed ratio during split-belt walking  
124 was 2:1. We selected an inclination of either 5° or 8.5° based on the level of the subject-  
125 specific motor impairments to ensure that all participants could complete the incline  
126 session.

127

128 Experimental protocols for both sessions consisted of three epochs (i.e., Baseline,  
129 Adaptation, and Post-Adaptation). These epochs were used to assess subjects' baseline  
130 walking characteristics and subjects' ability to adjust and recalibrate their gait for each

131 session-specific slope. Baseline: Subjects first experienced a baseline epoch, lasting at  
132 least 50 strides, was used to characterize their baseline gait at the specific inclination used  
133 throughout each session. Subjects walked with both belts moving at the same Mid speed  
134 (Table 1). A baseline epoch with the belts moving at the slow walking speed (i.e., 66.6%  
135 of the Mid speed) was also measured during the flat session. However, this epoch was  
136 removed in the incline session to ensure that all subjects could complete the entire  
137 protocol. Adaptation: Next, the Adaptation epoch was used to assess subjects' ability to  
138 adjust their locomotor pattern in response to a split-belt perturbation. During this epoch,  
139 the non-paretic leg walked twice as fast as the paretic leg. The paretic leg was confirmed  
140 with MRI. The speeds for the fast and slow belts and the duration of the Adaptation  
141 epoch for each subject are shown in Table 1. Post-Adaptation: Finally, The Post-  
142 Adaptation epoch was used to assess the after-effects when the split-belt condition was  
143 removed. Both belts moved at the same Mid speed as in the Baseline epoch. We counted  
144 the number of strides in real-time to regulate the duration for each epoch, where a stride  
145 was defined as the period between two consecutive heel-strikes (i.e., foot landings) of the  
146 same leg. All participants took resting breaks as requested. Also, all subjects wore a  
147 safety harness attached to a sliding rail in the ceiling to prevent falls. In addition, there  
148 was a handrail in front of the treadmill for balance support, but individuals were  
149 encouraged to hold on to it only if needed.

150

## 151 **2.2 Data Collection**

152

153 Kinematic and kinetic data were used to characterize subjects' ability to adapt



154 their gait during Adaptation, and retain the learned motor pattern during Post-  
155 Adaptation. Kinematic Data: Kinematic data were collected with a passive motion  
156 analysis system at 100 Hz (Vicon Motion Systems, Oxford, UK). Subjects' behavior was  
157 characterized with passive reflective markers placed symmetrically on the ankles (i.e.,  
158 lateral malleolus) and the hips (i.e., greater trochanter) and asymmetrically on the shanks  
159 and thighs (to differentiate the legs). The origin of the kinematic data was rotated with  
160 the treadmill in the incline conditions such that the z-axis ('vertical' in the flat condition)  
161 was always orthogonal to the surface of the treadmill (Figure 1B). Gaps in raw kinematic  
162 data were filled with a quintic spline interpolation (Woltring; Vicon Nexus Software,  
163 Oxford Uk). Kinetic Data: Kinetic data were collected with an instrumented split-belt  
164 treadmill at 1,000 Hz (Bertec, Columbus, OH). Force plates were zeroed prior to each  
165 testing session so that each force plate's weight did not affect the kinetic measurements.  
166 In addition, the reference frame was rotated at the inclination of each specific experiment  
167 such that the anterior-posterior forces were aligned with the surface on which the subjects  
168 walked. A heel-strike was identified in real-time when the raw normal force under each  
169 foot reached a threshold of 30 N. This threshold was chosen to ensure accurate counting  
170 of strides at all slopes. On the other hand, we used a threshold of 10 N on median filtered  
171 data (with a 5 ms window) to detect the timing of heel strikes more precisely for data  
172 processing.

173

174

## 175 **2.3 Data Analysis**

176

### 177 **2.3.1 Kinematic Data Analysis**

178

179 Kinematic behavior was characterized with step length asymmetry, which exhibits  
180 robust adaptation in split-belt paradigms (e.g., Reisman et al., 2005) and is of clinical  
181 interest. It is calculated as the difference in step length between the two legs on  
182 consecutive steps. Step length (SL) is defined as the distance in millimeters between the  
183 ankle markers at heel strike. Therefore, equal step lengths result in zero step length  
184 asymmetry. A positive step length asymmetry indicates that the non-paretic leg's step  
185 length was longer than the paretic leg's step length. Step length asymmetry was  
186 normalized by stride length, which is the sum of two consecutive step lengths, resulting  
187 in a unitless parameter that is robust to inter-subject differences in step size.

188

189 Each step length was also decomposed into anterior and posterior foot distances  
190 relative to the hip position (Figure 1B) as in previous work (Finley et al., 2015). This was  
191 done to quantify the leading and trailing legs' positions relative to the body when taking a  
192 step because inclination is known to affect these measures (Dewolf et al., 2017; Leroux et  
193 al., 2002). The leading leg's position ( $\alpha$ ) was computed as the distance in millimeters  
194 between the leading leg's ankle and the hip at heel strike; similarly, the trailing leg's  
195 position ( $X$ ) was computed as the distance in millimeters between the trailing leg's  
196 ankle and the hip at heel strike. The hip position, which is a proxy for the body's position,  
197 was estimated as the mean instantaneous position across hip markers. By convention

198 positive  $\alpha$  values indicate that the foot landed in front of the hips, whereas negative  $X$   
199 values indicate that the trailing leg was behind the hips. Note that the magnitudes of  $\alpha$   
200 and  $X$  summed to the leading leg's step length. As indicated in Figure 1B,  $\alpha$  and  $X$  were  
201 computed aligned to the treadmill's surface in all sloped conditions.

202

### 203 **2.3.2 Kinetic Data Analysis**

204

205 Kinetic data were used to characterize the adaptation of ground reaction  
206 forces. We focused our analysis on the propulsion component of the anterior-posterior  
207 ground reaction forces for three reasons: 1) propulsion forces are augmented by incline  
208 walking (e.g., Lay et al., 2006, 2007), 2) these are associated with augmented kinematic  
209 adaptation during split-belt walking (Sombric et al., 2019), and 3) they are associated  
210 with hemiparetic gait pathologies (Balasubramanian et al., 2007; Bowden et al.,  
211 2006). The anterior-posterior ground reaction forces (AP forces) were first low-pass  
212 filtered with a cutoff frequency of 20 Hz. Then, they were normalized by each subject's  
213 body weight to account for inter-subject differences. Similar to our previous work, we  
214 computed peak propulsion forces (Sombric et al., 2019) as the maximum AP force ( $P_{\text{Paretic}}$   
215 and  $P_{\text{Non-Paretic}}$ ) excluding the initial positive AP forces following heel strike. Note that we  
216 did not remove slope-specific biases due to gravity because we focused on analyzing  
217 changes in propulsion forces between epochs of interest.

218

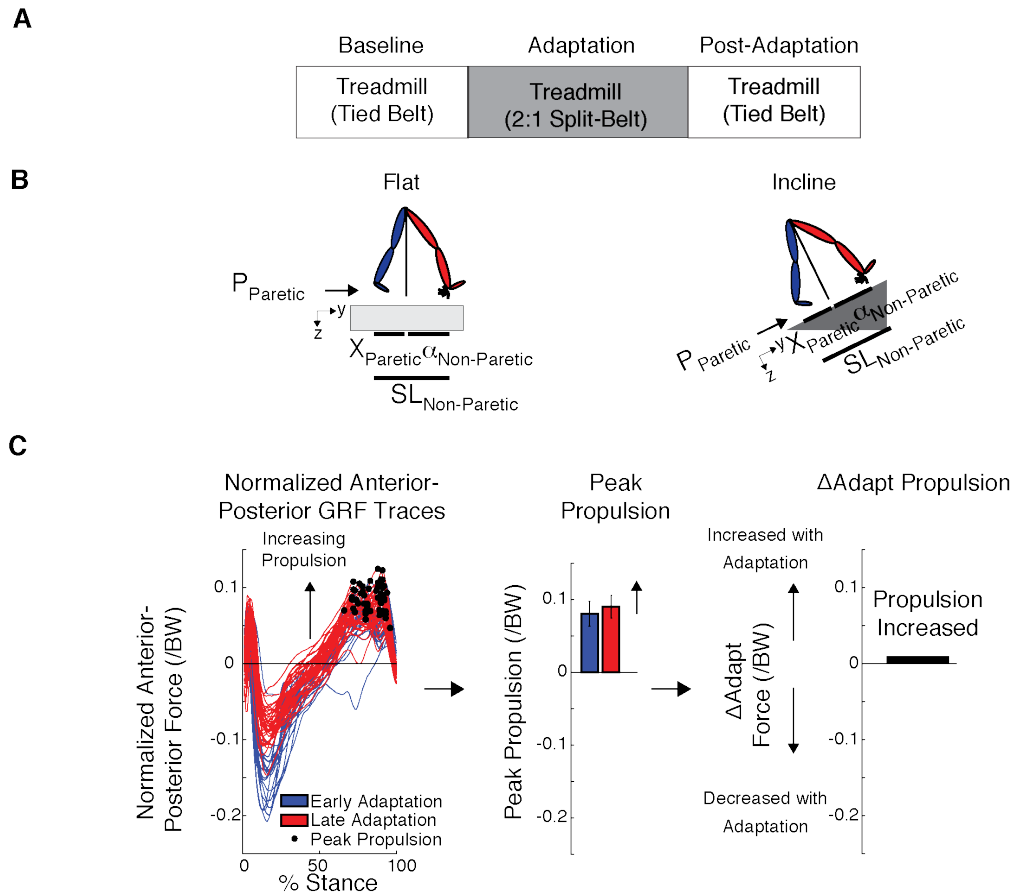

219

220 **Figure 1: Experimental Paradigm and Kinetic and Kinematic**

221 **Analysis** | (A) Paradigm used for both the flat and incline sessions to assess locomotor  
 222 adaptation during and after split-belt walking. Subjects walked flat for the entire flat  
 223 session, and incline (either 5° or 8.5°) for the entire incline session. The walking speeds,  
 224 duration of epochs, resting breaks and inclination were based on each subject's ability.  
 225 (B) The decomposition of step length into leading ( $\alpha$ ) and trailing (X) leg positions with  
 226 respect to the body is illustrated for each sloped condition. This decomposition was done  
 227 because it is known that inclination affects these aspects of step length differently  
 228 (Dewolf et al., 2017, 2018; Leroux et al., 2002). Also note that when taking a step, the  
 229 step length will depend on the position of the leading and trailing leg, which are  
 230 generating a braking and propulsion force, respectively. (C) We used the peak propulsion  
 231 force for each step to compute outcome measures of interest, such as the  $\Delta\text{Adapt}$   
 232 measure. This measure was computed to quantify increments or reductions in magnitude  
 233 within the adaptation epoch of each specific parameter. Note that increases in magnitude  
 234 were defined as positive changes, whereas decreases in magnitude were defined as  
 235 negative changes.

236

### 237 2.3.3 Kinetic and Kinematic Outcome Measures

238

239 Outcome measures were used to characterize kinematic and kinetic changes  
240 during the Adaptation and Post-Adaptation epochs relative to Baseline or within the  
241 Adaptation epoch. Outcome measures of interest were Baseline, Late Adaptation, After-  
242 Effects,  $\Delta\text{Adapt}$ , and  $\Delta\text{Post}$ . **Baseline** was defined as the average of the last 40 strides of  
243 the Baseline epoch for all parameters. This outcome measure characterized subjects'  
244 baseline gait characteristics at each sloped environment and was used as a reference for  
245 Late Adaptation and After-Effects. **Late Adaptation** was defined as the difference  
246 between the average of the last 40 strides of the Adaptation epoch and Baseline for all  
247 parameters. This outcome measure indicated the steady state behavior reached at the end  
248 of the Adaptation epoch. **After-Effects** were defined as the difference between the  
249 average of the first 5 strides of Post-Adaptation and Baseline values (e.g., Post-  
250 Adaptation - Baseline). Positive After-Effect values indicated increments in magnitude of  
251 a specific parameter during Post-Adaptation relative to Baseline, and vice versa for  
252 negative values. We also characterized the behavioral changes within Adaptation and  
253 Post-Adaptation with  $\Delta\text{Adapt}$  and  $\Delta\text{Post}$ , respectively.  **$\Delta\text{Adapt}$**  was computed as the  
254 difference between Late Adaptation and Early Adaptation values (i.e., average of the first  
255 5 strides during the Adaptation epoch).  **$\Delta\text{Post}$**  was computed as the difference between  
256 Baseline and early Post-Adaptation (e.g., Baseline - Post-Adaptation). Baseline was used  
257 instead of late Post-Adaptation because the duration of the Post-Adaptation epoch was  
258 not sufficiently long enough in all individuals to extinguish split-belt After-Effects. Thus,  
259 Baseline behavior was used a proxy for the late Post-Adaptation behavior.  $\Delta\text{Adapt}$  and

260  $\Delta$ Post were calculated such that an increase in the magnitude of a parameter during either  
261 Adaptation or Post-Adaptation resulted in positive values and a reduction of a parameter  
262 during these epochs resulted in negative values. Figure 1C illustrates an example, to  
263 illustrate  $\Delta$ Adapt for propulsion forces.

264

## 265 **2.4 Statistical Analysis**

266

267 A significance level of  $\alpha=0.05$  was used for all statistical tests. All statistical  
268 analyses were performed either with Stata (StataCorp LP, College Station, TX) or with  
269 MATLAB (The MathWorks, Inc., Natick, Massachusetts, United States).

270

### 271 **2.4.1. Group analyses**

272

273 Session averages were compared to determine the effect of slope on each of our  
274 outcome measures using kinetic (e.g.,  $P_{\text{paretic}}$ ) and kinematic parameters (e.g., step length  
275 asymmetry). We considered that slope might influence gait (Baseline), the extent of  
276 movement update during Adaptation or Post-Adaptation ( $\Delta$ Adapt and  $\Delta$ Post), the final  
277 adapted state reached (Late Adaptation), and/or After-Effects. Thus, the influence of  
278 slope was assessed for each of these outcome measures with paired t-tests. A post-hoc,  
279 one sample t-test was utilized to determine if  $\Delta$ Post was significantly different from zero  
280 in the flat session.

281

282           During baseline walking, it was also of interest to identify differences between the  
283   paretic and non-paretic legs in addition to determining the effect of slope on outcome  
284   measures. Therefore, we performed ANOVAs with individual subjects as a random factor  
285   to account for the paired nature of the data set and slope and leg as fixed, repeated  
286   factors. These ANOVAs were performed on the peak propulsion values and the trailing  
287   leg's position because our study was focused on the propulsion phase of the gait cycle,  
288   which is associated to these two parameters.

289

290           The changes of both step lengths during the Adaptation and Post-Adaptation  
291   epochs for the flat and incline sessions was also of interest. Therefore, we performed an  
292   ANOVA with individual subjects as a random factor to account for the paired nature of  
293   the data, and the fixed factors are slope, leg, and epoch. Slope and leg were considered  
294   repeated factors in the analysis. Epoch is not repeated and is treated as a between-subject  
295   factor given that these epochs are not directly associated (Sombric et al., 2019).

296

#### 297   **2. 4. 2. Regression analyses**

298

299           We tested the association between leg positions (' $\alpha$ ' and 'X') during speed-  
300   specific Baseline and Late Adaptation to determine if Late Adaptation values could be  
301   predicted from Baseline values in stroke survivors, as observed in young unimpaired  
302   subjects (Sombric et al., 2019). We specifically tested the model  $|y| = a*|z|$ , where  $y$  is the  
303   predicted leg position during Late Adaptation and  $z$  is the leg position recorded during  
304   Baseline. We also tested the ipsilateral association between the leading leg's position

305 during Late Adaptation and Post-Adaptation and the contralateral association between the  
306 trailing leg's position during these two epochs in stroke survivors, since these relations  
307 were also observed in young individuals (Sombric et al., 2019). Thus, we tested the  
308 model  $|y| = a*|z|$ , where  $y$  is each leg's position during Early Post-Adaptation and  $z$  is  
309 either the ipsilateral ' $\alpha$ ' position recorded during Late Adaptation or the contralateral ' $X$ '  
310 position recorded during Late Adaptation. An absolute model was utilized so that the  
311 data would not bias the results of the regression to be linear by having a cluster of  
312 positive ( $\alpha$ ) and negative ( $X$ ) data points.

313

## 314 Results

315

### 316 **Adaptation and recalibration of step length asymmetry are augmented when** 317 **walking incline**

318

319 Step length asymmetry adaptation and recalibration were augmented by incline  
320 walking. Figure 2A illustrates the evolution of step length asymmetry throughout the flat  
321 and incline sessions. Figure 2B shows a wide range of baseline step length asymmetries  
322 across individuals (colored lines) for each slope condition. On average, these baseline  
323 biases were not different between flat and incline walking ( $p=0.30$ ). During Adaptation,  
324 participants exhibited similar changes in step length asymmetry from early to late  
325 adaptation (Figure 2D,  $p=0.75$ ), but they were more symmetric in the incline than the flat  
326 session in Late Adaptation (Figure 2C,  $p=0.004$ ). Furthermore, the incline session had  
327 larger magnitudes of After-Effects during early Post-Adaptation relative to the flat



328 session (Figure 2E,  $p=0.008$ ). Thus, incline walking augmented the symmetry in step  
 329 lengths during Late Adaptation and the magnitude of After-Effects.  
 330

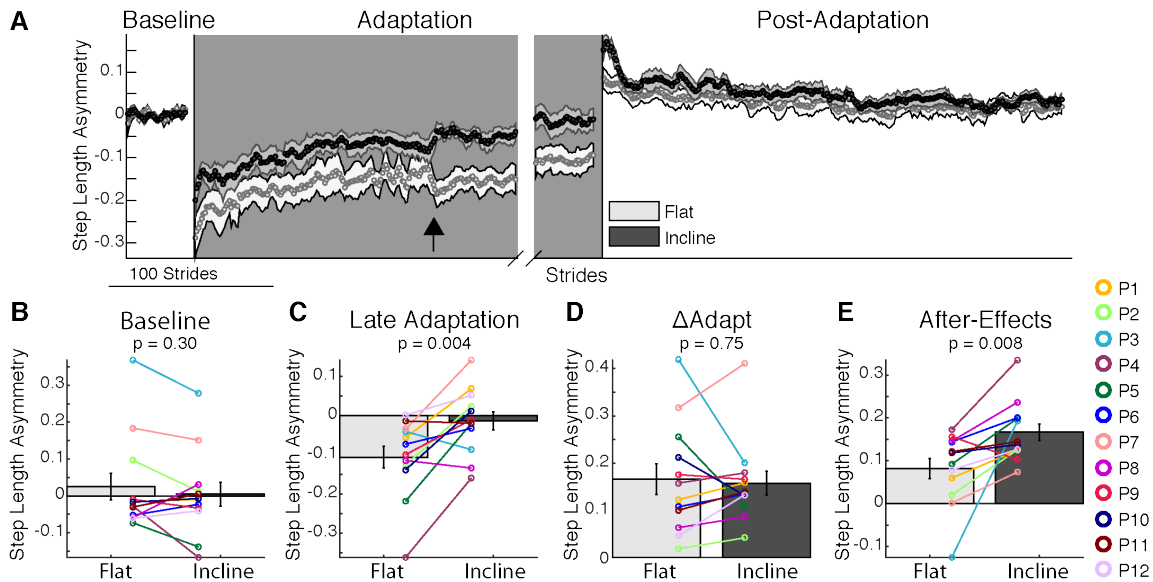

331  
 332 **Figure 2: Step Length Asymmetry Adaptation and Recalibration** | (A) Stride-by-  
 333 stride time course of step length asymmetry during Baseline, Adaptation, and Post-  
 334 Adaptation for each session are shown. Note that each subject's baseline bias has been  
 335 removed. Each data point represents the average of 5 consecutive strides and shaded  
 336 regions indicate the standard error for each session. For display purposes only, we  
 337 include in the time courses stride values that were computed with a minimum of 10  
 338 subjects. The black arrow indicates a discontinuity in the data caused by many subjects  
 339 taking a resting break at the same time. (B-E) The height of the bars indicates group  
 340 average step length asymmetry  $\pm$  standard errors. Individual subjects are represented with  
 341 colored dots connected with lines. (B) Baseline: Baseline step length asymmetry is not  
 342 influenced by slope. (C) Late Adaptation: Note that each session plateaued at different  
 343 step length asymmetry values during the Adaptation epoch such that subjects reached  
 344 more symmetric step lengths in the incline session than the flat session (D)  $\Delta$ Adapt:  
 345 Participants changed their gait by similar amounts during the Adaptation epoch in both  
 346 sessions. (E) After-effects: Subjects had larger After-Effects during early Post-  
 347 Adaptation in the incline session than the flat session, which is consistent with the Late  
 348 Adaptation differences across sessions.  
 349

350 **Both step lengths contribute to step length asymmetry adaptation and after-effects**  
351 **during incline walking in the asymmetric motor system**

352

353 Stroke subjects adjusted both step lengths during split-belt walking. Stroke  
354 subjects modulate both their slow (paretic) and fast (non-paretic) step lengths during  
355 Adaptation and have After-Effects during Post-Adaptation (Figure 3A). The change of  
356 each step length during the Adaptation and Post-Adaptation epochs are quantified in  
357 Figure 3B. There was a significant effect of epoch ( $p_{\text{epoch}}=0.001$ ) and interaction between  
358 leg and epoch ( $p_{\text{leg}\#\text{epoch}}<0.001$ ) indicating that the step length with the paretic leg is  
359 reduced during Adaptation, but increased during Post-Adaptation and vice versa for the  
360 non-paretic leg. Overall, slope did not alter step length changes ( $p_{\text{slope}}=0.16$ ,  
361  $p_{\text{slope}\#\text{leg}}=0.18$ ,  $p_{\text{slope}\#\text{epoch}}=0.17$ ), except for the paretic leg's de-adaptation quantified by  
362  $\Delta\text{Post}$  ( $p_{\text{leg}\#\text{epoch}\#\text{slope}}=0.016$ ). More specifically, the paretic step lengths did not exhibit de-  
363 adaptation in the flat session (i.e.,  $\Delta\text{Post}$  is not different from zero,  $p=0.38$ ), whereas step  
364 lengths for both legs had significant de-adaptation in the incline session (i.e., non-zero  
365  $\Delta\text{Post}$ ,  $p<0.001$ ). Stroke subjects use both their paretic and non-paretic leg to counteract  
366 the split-belt perturbation and both legs are recalibrated following incline adaptation.

367

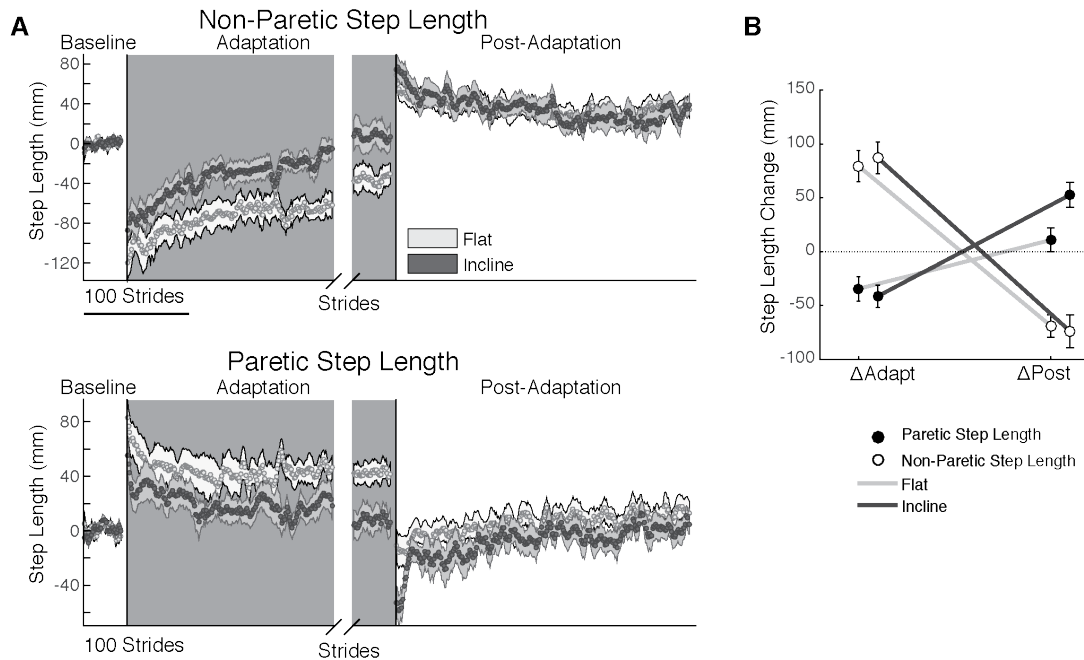

368

369

370 **Figure 3: Step length Adaptation and After-Effects.** | (A) Stride-by-stride time courses  
371 of step lengths when either the non-paretic leg (top panel, fast leg during Adaptation) or  
372 the paretic leg is leading (bottom panel, slow leg during Adaptation) are shown during  
373 Baseline, Adaptation, and Post-Adaptation. Each data point represents the average of 5  
374 consecutive strides and shaded regions indicate the standard error for each group. For  
375 display purposes only, we include stride values during Post-Adaptation that were  
376 computed with a minimum of 10 subjects. (B) The effect of slope on each leg's change  
377 during Adaptation ( $\Delta\text{Adapt}$ ) and Post-Adaptation ( $\Delta\text{Post}$ ) is illustrated. Note that both the  
378 paretic and non-paretic leg adapted similarly. While the non-paretic leg has recalibrated  
379 ( $\Delta\text{Post} \neq 0$ ) following both the flat and incline session, the paretic leg is only recalibrated  
380 following incline Adaptation.

380

381

**Slope and speed-specific walking demands determine the distinct step length**

382

**asymmetries across inclination conditions**

383

384

Speed and slope-specific leg orientations mediated the distinct step length

385

asymmetries selected during Late Adaptation and early Post-Adaptation. Figure 4A

386

illustrates a top-down view of the baseline leg orientations that contribute to each step

387

length relative to the hips. The stroke subjects' leg positions are diverse across subjects

388 (colored lines,  $p_{\text{Individual}}=0.002$ ), but the trailing leg position,  $X$ , is increased in both legs  
389 during incline walking ( $p_{\text{Slope}}=0.042$ ,  $p_{\text{Leg}}=0.22$ ,  $p_{\text{Slope}\#\text{Leg}}=0.76$ ). The schematic in figure  
390 4B illustrates how young subjects are able to recover speed-specific leg orientations  
391 (Sombric et al 2019). Figure 4C indicates that this is also true for stroke individuals  
392 based on the paretic leg's leg orientation during slow baseline walking and late  
393 adaptation (solid cyan line;  $|y|=a|x|$ ; 95% confidence interval of  $a=[0.92, 1.13]$ ,  $R^2=0.76$ ,  
394  $p<0.001$ ). We also show as a reference, the relation between (recorded) Baseline and  
395 (predicted) Late Adaptation leg orientation values for both legs and inclinations in young  
396 unimpaired individuals (magenta dashed line;  $(|y|=a|x|)$ ; 95% confidence interval of  
397  $a=[0.91, 0.96]$ ,  $R^2=0.89$ ,  $p<0.001$ ). Note the similarity between the intact and lesioned  
398 behavior (cyan vs. magenta lines). The leg orientations selected during Late Adaptation  
399 influence Post-Adaptation behavior as is illustrated in Figure 4D. Specifically, the  
400 leading leg's orientations were similar before and after removal of the split-belt  
401 perturbation (i.e., Late Adaptation  $\alpha_{\text{Paretic}}=\text{Post-Adaptation } \alpha_{\text{Paretic}}$  and vice versa)  
402 whereas the trailing legs' orientations were swapped between the legs (i.e. Late  
403 Adaptation  $X_{\text{Paretic}} = \text{Post-Adaptation } X_{\text{Non-Paretic}}$  and vice versa). This is supported by the  
404 significant relationship between Late Adaptation and Post-Adaptation leg orientations  
405 observed when individual subjects' values for each leg and both sloped sessions are  
406 regressed (Figure 4E; solid cyan line;  $|y|=a|x|$ ; 95% confidence interval of  $a=[0.94$ ,  
407  $1.02]$ ,  $R^2=0.79$ ,  $p<0.001$ ). We also show as a reference, the relation between (recorded)  
408 Late Adaptation and (predicted) Post-Adaptation leg orientation values for both legs and  
409 both sloped conditions in young unimpaired individuals (magenta dashed line;  $(|y|=a|x|)$ ;  
410 95% confidence interval of  $a=[0.95, 1.03]$ ,  $R^2=0.78$ ,  $p<0.001$ ). Note the similarity

411 between the intact and lesioned behavior (cyan vs. magenta lines). Similar to the intact  
 412 motor system, the lesioned motor system is able to recover speed and slope-specific leg  
 413 orientations during Late Adaptation, which propagate to Post-Adaptation in a predictable  
 414 way.  
 415

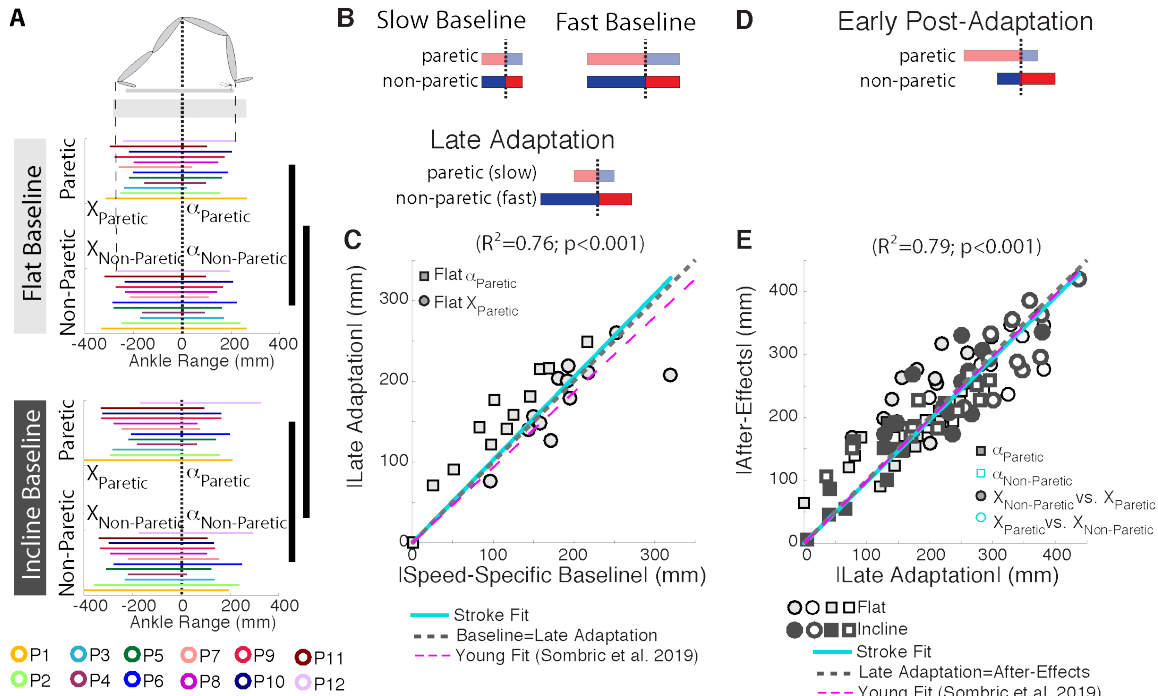

416  
 417 **Figure 4: Leg orientation Adaptation and After-Effects.** | (A) Leg orientations are  
 418 depicted for individual subjects (as indicated with different colors) in both the flat and  
 419 incline conditions. Note that subjects orient their legs about their bodies differently and  
 420 that subjects alter their leg orientation based on slope. Thick vertical black lines indicated  
 421 that there is a significant effect of leg (i.e., parietic or non-parietic) and slope (i.e., flat or  
 422 incline) on trailing leg positions. (B) Schematic of the slow and fast (predicted) baseline  
 423 behavior for the parietic and non-parietic leg orientations, respectively. The speed-specific  
 424 leg orientations were regained during Late Adaptation. (C) The similarity between leg  
 425 orientations across the speed-specific Baseline and Late Adaptation epochs is illustrated  
 426 by the significant regression (solid cyan line;  $|y| = a \cdot |x|$ , 95% Confidence interval for  $a =$   
 427  $[0.92, 1.13]$ ). Recall that a slow Baseline was only collected in the flat session, thus only  
 428 the slow Baseline and Late Adaptation for the parietic leg (which walked slow during  
 429 Adaptation) are shown. Note that the regression line closely overlaps with the idealized  
 430 situation in which baseline and late adaptation values are identical (dashed gray line;  
 431 slope of one, i.e.,  $y = x$ ) and the behavior of young, healthy adults (sombric et al. 2019,

432 dashed magenta line). **(D)** Schematic of the leg orientations during early Post-Adaptation.  
433 The forward leg positions are ipsilaterally and the trailing leg positions are contralaterally  
434 maintained from split-to-tied walking. **(E)** The ipsilateral and contralateral similarity  
435 between  $\alpha$  and  $X$ , respectively, across the Late Adaptation and early Post-Adaptation  
436 epochs is quantified with a significant correlation (solid cyan line;  $|y| = a * |x|$ , 95%  
437 Confidence interval for  $a = [0.94, 1.02]$ ). The idealized situation in which Late  
438 Adaptation and early Post-Adaptation values are identical (dashed gray line; slope of one,  
439 i.e.,  $y = x$ ) and the behavior of young, healthy adults (Sombric et al. 2019, dashed  
440 magenta line) are presented as a reference.  
441

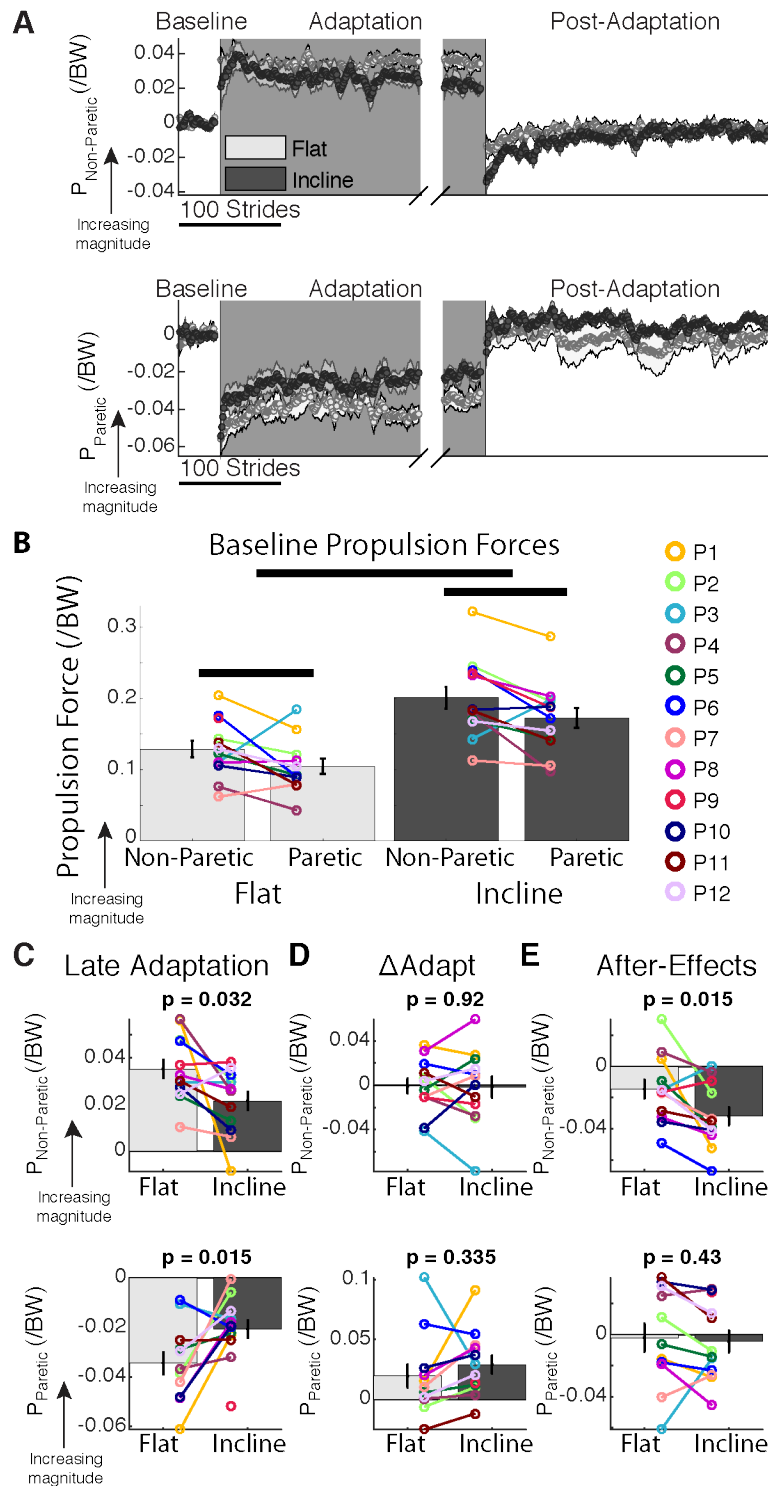

442

443

444

445

446

447

**Figure 5: Propulsion force Adaptation and After-Effects.** (A) Stride-by-stride time courses of propulsion forces of the non-paretic (top panel) and paretic leg (bottom panel) are shown during self-selected Baseline, Adaptation, and Post-Adaptation. Each data point represents the average of 5 consecutive strides and shaded regions indicate the standard error for each group. For display purposes only, we include stride values during

448 Post-Adaptation that were computed with a minimum of 10 subjects. **(B-E)** We display  
449 group average values for propulsion force outcome measures  $\pm$  standard errors.  
450 Individual subjects are represented with colored dots connected with lines. **(B)** Baseline:  
451 Thick horizontal black lines indicated that there is a significant effect of leg (i.e., paretic  
452 or non-paretic) and slope (i.e., flat or incline) on propulsion forces. On average, stroke  
453 subjects generate larger propulsion forces with their non-paretic leg, and they generate  
454 larger propulsion forces with both legs when walking incline. However, some individual  
455 stroke subjects generate larger propulsion forces with their paretic than their non-paretic  
456 leg. **(C)**  $\Delta$ Adapt: Propulsion forces were similarly modulated during the Adaptation  
457 epoch for both sloped conditions. **(D)** Late Adaptation: Stroke subjects were closer to  
458 their baseline propulsion forces in the incline than the flat sessions. Moreover, baseline  
459 propulsion forces in the incline session were larger than the flat session (Figure 2C).  
460 Taken together, these results suggest that stroke subjects are forced to propel more during  
461 incline split-belt walking with both legs compared to flat split-belt walking. **(E)** After-  
462 Effects: Even though both sloped sessions did not change the extent of propulsion force  
463 adaptation ( $\Delta$ Adapt), slope influenced the After-Effects for the non-paretic leg, but not  
464 the paretic leg.  
465

#### 466 **Larger after-effects of propulsion forces split-belt incline walking**

467

468 Sloped walking influenced the extent of recalibration of the non-paretic  
469 propulsion forces. It can be seen in Figure 5A that propulsion forces were altered during  
470 the Adaptation epochs. These data are plotted relative to baseline propulsion forces,  
471 which were larger in the incline condition and the non-paretic leg for both sloped  
472 conditions (Figure 5B:  $p_{\text{Individual}}=0.007$ ,  $p_{\text{Slope}}<0.0001$ ,  $p_{\text{Leg}}=0.040$ ,  $p_{\text{Slope}\#\text{Leg}}=0.43$ ). Note  
473 that subjects approached better the larger baseline propulsion values in the incline than  
474 flat session for both legs. In the case of the paretic side, this indicates that subjects were  
475 generating larger propulsion forces in the incline compared to flat during Late Adaptation  
476 (Figure 5C). Even though the Late Adaptation behavior was different across sessions  
477 (Figure 5C; non-paretic propulsion:  $p=0.032$ , paretic propulsion:  $p=0.015$ ), the changes in  
478 propulsion forces from early to late Adaptation were similar across sloped conditions



479 (Figure 5D; non-paretic propulsion:  $p=0.92$ , paretic propulsion:  $p=0.33$ ). While paretic  
480 propulsion After-Effects are similar in either sloped conditions (Figure 5E,  $p=0.43$ ), the  
481 non-paretic After-Effects are larger in magnitude following incline adaptation ( $p=0.015$ ).  
482 Note that the paretic propulsion forces change the most during Adaptation (Figure 5C),  
483 whereas the non-paretic propulsion forces are the ones exhibiting after-effects during  
484 Post-Adaptation (Figure 5E). In summary, incline walking demands greater propulsion  
485 forces in general, which lead to larger paretic propulsion during split-belt walking and  
486 after-effects that reduce the non-paretic propulsion.

487

## 488 Discussion

489

490 We investigated the influence of propulsion demands of walking on locomotor  
491 adaptation and recalibration in the asymmetric motor system post-stroke. We find that  
492 subjects adapt more during incline than flat split-belt walking. We also find that leg  
493 orientations during Adaptation are predictive of those Post-Adaptation, leading to greater  
494 step length asymmetry after-effects in the incline than flat sessions. Lastly, the larger  
495 after-effects in step length asymmetry result from shorter paretic step lengths and lower  
496 non-paretic propulsion forces during Post-Adaptation compared to Baseline walking in  
497 the incline session. In summary, the ability to control leg orientation to meet speed and  
498 force demands during split-belt walking is maintained post-stroke, which can be  
499 exploited for designing effective gait rehabilitation interventions in this clinical  
500 population.

501

502 **Post-stroke gait adapts more in response to larger propulsion demands**

503

504 We find that stroke subjects behave similarly to young, healthy adults in their  
505 response to sloped split-belt walking. Specifically, stroke subjects are able to augment  
506 their propulsion forces and adjust their leg orientations in response to incline split-belt  
507 walking as observed in young, healthy adults (Sombric et al., 2019). This is consistent  
508 with previous literature indicating that post-stroke patients at the chronic stage can  
509 modulate their gait in response to task demands (Awad et al., 2014; Hsiao et al., 2015,  
510 2016; Kesar et al., 2011, 2014; Reisman et al., 2013). Additionally, we observe that  
511 stroke survivors recover speed and slope-specific leg orientations in the paretic leg for the  
512 flat session. We speculate that the same would have been observed in both slope  
513 conditions and both legs, as observed in young individuals (Sombric et al., 2019). We  
514 think that this is a reasonable expectation given that stroke survivors exhibit similar  
515 control of leg orientations to young adults during Late Adaptation and early Post-  
516 Adaptation for both legs and sloped conditions. Thus, our results provide further evidence  
517 that steady state in the split-belt walking task can be predicted from baseline walking.

518

519 It has been previously suggested that baseline gait asymmetries determine the  
520 patients motor behavior at steady state split-belt walking (Malone and Bastian, 2014;  
521 Reisman et al., 2007). Our results provide new insights into the influence of baseline  
522 walking on adaptation. Specifically, we find that stroke survivors recover their baseline  
523 asymmetry in the incline, but not in the flat condition. Thus, it is not baseline gait  
524 asymmetry, but kinetic demands that seem to govern patients' motor patterns. More

525 specifically, our results suggest that that post-stroke survivors aim to recover the baseline  
526 leg orientations for the specific kinetic demands for each leg in the split condition, as  
527 observed in young adults (Sombric et al., 2019). Further, the forward leg orientation in  
528 the split condition might be adjusted to harness energy from the treadmill (Sánchez et al.,  
529 2019). However, the trailing leg orientation does not match the behavior predicted from  
530 an objective function solely based on minimizing work (Supplementary Figure 1). Thus,  
531 there might be some other factors such as stability (Buurke et al., 2018) or metabolic  
532 energy (Gordon et al., 2009) regulating leg orientation in walking. In summary, the forces  
533 generated to propel one's body forward constitute an important control variable  
534 regulating the adaptation of movements in the intact and asymmetric motor systems.

535

### 536 **Bilateral adaptation in stroke survivors contrasts unilateral adaptation in young** 537 **adults**

538

539 Stroke subjects recruit both legs in order to adapt their gait, whereas young adults  
540 primarily adapt one leg. Notably, our results show that stroke survivors adjusted the step  
541 lengths taken with the paretic and non-paretic legs walking on the slow and fast belts,  
542 respectively. In contrast, we have previously observed that young individuals mostly  
543 adjusted the step length of the leg walking on the fast belt (Sombric et al., 2019). This  
544 could be because stroke survivors may require more repetitions in the altered  
545 environment to recover their baseline leg orientation with their paretic leg, whereas intact  
546 subjects can do so immediately after the split condition is introduced. Alternatively, it  
547 could be that the larger neural coupling post-stroke (Kloter et al., 2011) enhances

548 bilateral adaptation. Regarding post-adaptation, after-effects are only observed in the  
549 paretic leg in the incline condition. More specifically, paretic step lengths become longer  
550 than in baseline walking, which is beneficial for stroke survivors regularly taking short  
551 paretic step lengths (Balasubramanian et al., 2007). On the other hand, after-effects are  
552 observed in the non-paretic leg, regardless of the sloped condition. This is atypical since  
553 the non-paretic leg walked fast in the split condition and young adults only exhibit after-  
554 effects in the leg that walked slow (Sombric et al., 2019). This atypical behavior consists  
555 of shortening step lengths compared to baseline walking and might be a strategy to  
556 recover balance (e.g., Eng et al., 1994), which is challenged upon removal of the split  
557 condition (Buurke et al., 2018; Iturralde and Torres-Oviedo, 2019). In summary, stroke  
558 subjects adapt both legs during split-belt walking, but the paretic step lengths only change  
559 after the incline split condition.

560

561 **Neurorehabilitation through reinforcement of a corrective pattern during**  
562 **adaptation, rather than short-lived after-effects post-adaptation.**

563

564 The long-term therapeutic effect of locomotor adaptation with split-belt treadmills  
565 may be due to walking with the motor demands of the split-belt task, rather than the  
566 After-Effects. Split-belt walking has been shown to reduce step length asymmetries  
567 (Lewek et al., 2018; Reisman et al., 2013). However, it remains an open question what  
568 aspects of the split-belt walking underlie these long term changes. Aftereffects could lead  
569 to motor improvements (Bastian, 2008). Namely, some patients exhibit reduced gait  
570 asymmetry immediately after split-belt walking (Choi et al., 2009; Reisman et al., 2007).

571 However, these after-effects are short lived and decrease as individuals experience  
572 multiple days of practicing the split-belt condition (Larish et al., 1988; Leech et al., 2018;  
573 Sombric et al., 2017). It is known that regular treadmill walking cannot modify gait  
574 asymmetries post-stroke (Kautz et al., 2005; Den Otter et al., 2006; Silver et al., 2000),  
575 suggesting that the specific motor demands of the split-belt task might be important for  
576 neurorehabilitation. For example, we observe that the split condition forces post-stroke  
577 individuals to take longer paretic step lengths and generate greater paretic propulsion.  
578 Perhaps practice of these gait features through multiple exposure to the split situation  
579 might lead to long term changes in gait symmetry. It is also possible that the strenuous  
580 nature of split-belt walking increases neural plasticity, as shown with other high-intensity  
581 exercises (Andrews et al., 2019). Thus, incline split-belt walking may be beneficial not  
582 only for inducing greater paretic propulsion, but also because it is more demanding than  
583 level walking (Johnson et al., 2002). Lastly, it is also possible that the initial disruption of  
584 step length asymmetry, which is experienced multiple times during split-belt training, is  
585 fundamental for individuals to start exploring new patterns that could converge to more  
586 metabolically efficient gait than their baseline walking pattern (Sánchez et al., 2019;  
587 Selinger et al., 2015). In summary, the long term benefit of split-belt walking may  
588 originate from practicing motor patterns specific to split-belt walking, rather than  
589 reinforcement of those observed during post-adaptation.  
590

591 **Clinical implications**

592

593 Split-belt walking has been shown to induce long term changes that could  
594 improve the mobility of stroke survivors (Betschart et al., 2018; Lewek et al., 2018;  
595 Reisman et al., 2013). However, there is little understanding for what leg should walk on  
596 the slow or the fast belt during the split condition (Finley et al., 2015; Malone and  
597 Bastian, 2014; Reisman et al., 2007, 2009). For instance, one may consider that the  
598 paretic leg should walk on the slow belt to force stroke survivors to use it more, as a form  
599 of “constrained use therapy” (e.g., Kwakkel et al., 2015). On the other hand, our results  
600 here and in a previous study (Sombric et al., 2019) indicate that placing the paretic leg on  
601 the fast leg would force subjects to augment their paretic propulsion and lengthen their  
602 paretic steps during split-belt walking, which would be beneficial if these were the  
603 patterns that one would like to reinforce. Future studies are needed to determine if stroke  
604 survivors could actually augment their paretic propulsion forces during split-belt walking,  
605 as observed in the fast leg of young adults (Sombric et al., 2019). This remains an open  
606 question given that we observed limited changes in paretic propulsion post-adaptation  
607 compared to those reported in controls (Sombric et al., 2019). In sum, our study provides  
608 greater understanding of the motor demands associated to the split-belt task, which could  
609 be harnessed for gait neurorehabilitation.

610

611 The ability to augment locomotor adaptation and recalibration in the lesioned  
612 motor system with incline split-belt training is promising, but future studies are needed to  
613 determine if this will be a more effective intervention than flat split-belt walking. Notably

614 not all stroke survivors re-learn to walk symmetrically following several training weeks  
615 of flat split-belt walking (Betschart et al., 2018; Lewek et al., 2018; Reisman et al., 2013).  
616 Thus, it is clinically relevant to explore alternative strategies to augment adaptation in  
617 stroke survivors other than increasing the speed difference (Yokoyama et al., 2018) since  
618 not all patients can walk with large speed differences. This work supports that the extent  
619 of adaptation in the split condition can be augmented by increasing the propulsion  
620 demands required by the task, which in turn would possibly make split-belt walking more  
621 effective to more patients. Previous research, however, indicates that overground walking  
622 post-stroke is most improved following decline, rather than incline, interventions due to  
623 greater similarity in motor patterns between the flat and decline conditions (Carda et al.,  
624 2013). Thus, the augmented adaptation in the incline environment may not transfer to  
625 overground walking. Therefore, the efficacy of our protocol as an intervention will  
626 depend on future work assessing its generalization to level walking.

627

#### 628 **Competing interests:**

629 The authors have no conflicts of interest to report.

#### 630 **Author Contributions**

631 All experiments were performed in the Sensorimotor Learning Laboratory. G.T. and C.S. were  
632 involved with the conception and design of the work. C.S. collected and analyzed the data. C.S.  
633 and G.T. interpreted the results. C. S. drafted the manuscript, which was carefully revised by all  
634 authors. The final version of the manuscript has been approved by all the authors who agree to  
635 be accountable for all aspects of the work in ensuring that questions related to the accuracy or

636 integrity of any part of the work are appropriately investigated and resolved. All authors qualify  
 637 for authorship and all those who qualify for authorship are listed.

## 638 Funding

639 C.S. is funded by a fellowship from the National Science Foundation (NSF-GRFP); CRDF 4.30204;  
 640 NSF1535036; AHA 15SDG25710041

## 641 Acknowledgements

642 The authors acknowledge the valuable input from Pablo Iturralde and Digna de Kam.

## 643 Supplementary Material

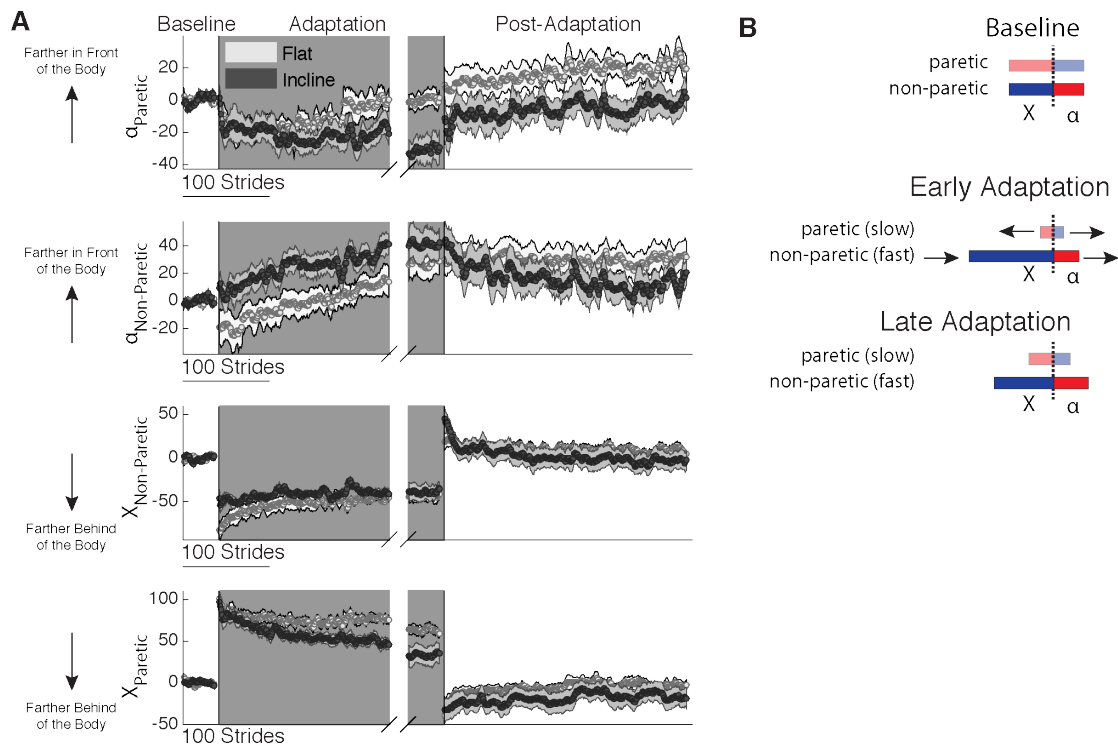

644 **Supplementary Figure 1: Leg Position Adaptation and After-Effects in the**  
 645 **Asymmetric Motor System| (A)** Stride-by-stride time courses of leg positions ( $\alpha$  and  $X$ )  
 646 for the non-paretic and paretic leg are shown during self-selected Baseline, Adaptation,  
 647 and Post-Adaptation. Each data point represents the average of 5 consecutive strides and  
 648



649 shaded regions indicate the standard error for each group. The beginning and Late  
650 Adaptation group average behavior are shown for the Adaptation epoch. For display  
651 purposes only, we include stride values during Post-Adaptation that were computed with  
652 a minimum of 10 subjects. **(B)** Schematic of the self-selected Baseline, early Adaptation,  
653 and late Adaptation behavior for the paretic and non-paretic leg orientations, respectively.  
654 Note that there is a general forward movement of the leg position of the non-paretic leg,  
655 but the paretic leg increases both the leading and trailing positions.

656

## 657 Bibliography

- 658 Andrews, S. C., Curtin, D., Hawi, Z., Wongtrakun, J., Stout, J. C., and Coxon, J. P.  
659 (2019). Intensity Matters: High-intensity Interval Exercise Enhances Motor Cortex  
660 Plasticity More Than Moderate Exercise Sophie. *Cereb. Cortex*, 1–12.  
661 doi:10.1093/cercor/bhz015.
- 662 Awad, L. N., Reisman, D. S., Kesar, T. M., and Binder-Macleod, S. A. (2014). Targeting  
663 paretic propulsion to improve poststroke walking function: A preliminary study.  
664 *Arch. Phys. Med. Rehabil.* 95, 840–848. doi:10.1016/j.apmr.2013.12.012.
- 665 Balasubramanian, C. K., Bowden, M. G., Neptune, R. R., and Kautz, S. A. (2007).  
666 Relationship Between Step Length Asymmetry and Walking Performance in  
667 Subjects With Chronic Hemiparesis. *Arch. Phys. Med. Rehabil.* 88, 43–49.  
668 doi:10.1016/j.apmr.2006.10.004.
- 669 Bastian, A. A. J. (2008). Understanding sensorimotor adaptation and learning for  
670 rehabilitation. *Curr. Opin. Neurol.* 21, 628–633.  
671 doi:10.1097/WCO.0b013e328315a293.Understanding.
- 672 Betschart, M., McFadyen, B. J., and Nadeau, S. (2018). Repeated split-belt treadmill  
673 walking improved gait ability in individuals with chronic stroke: A pilot study.

- 674 *Physiother. Theory Pract.* 34, 81–90.
- 675 Bowden, M. G., Balasubramanian, C. K., Neptune, R. R., and Kautz, S. a. (2006).  
676 Anterior-Posterior Ground Reaction Forces as a Measure of Paretic Leg  
677 Contribution in Hemiparetic Walking. *Stroke* 37, 872–876.  
678 doi:10.1161/01.STR.0000204063.75779.8d.
- 679 Buurke, T. J. W., Lamoth, C. J. C., Vervoort, D., van der Woude, L. H. V., and den Otter,  
680 R. (2018). Adaptive control of dynamic balance in human gait on a split-belt  
681 treadmill. *J. Exp. Biol.* 221, jeb174896. doi:10.1242/jeb.174896.
- 682 Carda, S., Invernizzi, M., Baricich, A., Cognolato, G., and Cisari, C. (2013). Does  
683 altering inclination alter effectiveness of treadmill training for gait impairment after  
684 stroke? A randomized controlled trial. *Clin. Rehabil.* 27, 932–938.  
685 doi:10.1177/0269215513485592.
- 686 Choi, J. T., Vining, E. P. G., Reisman, D. S., and Bastian, A. J. (2009). Walking  
687 flexibility after hemispherectomy: split-belt treadmill adaptation and feedback  
688 control. *Brain* 132, 722–33. doi:10.1093/brain/awn333.
- 689 Dewolf, A. H., Ivanenko, Y. P., Lacquaniti, F., and Willems, P. A. (2017). Pendular  
690 energy transduction within the step during human walking on slopes at different  
691 speeds. *PLoS One* 12, 1–25. doi:10.1371/journal.pone.0186963.
- 692 Dewolf, A. H., Ivanenko, Y., Zelik, K. E., Lacquaniti, F., and Willems, P. A. (2018).  
693 Kinematic patterns while walking on a slope at different speeds. *J. Appl. Physiol.*  
694 125, 642–653. doi:10.1152/jappphysiol.01020.2017.
- 695 Eng, J. J., Winter, D. A., and Patla, A. E. (1994). Strategies for recovery from a trip in  
696 early and late swing during human walking. *Exp. Brain Res.* 102, 339–349.

- 697 Finley, J. M., Long, A., Bastian, A. J., and Torres-Oviedo, G. (2015). Spatial and  
698 Temporal Control Contribute to Step Length Asymmetry During Split-Belt  
699 Adaptation and Hemiparetic Gait. *Neurorehabil Neural Repair* 29, 786–795.  
700 doi:1545968314567149.
- 701 Gordon, K. E., Ferris, D. P., and Kuo, A. D. (2009). Metabolic and Mechanical Energy  
702 Costs of Reducing Vertical Center of Mass Movement During Gait. *Arch. Phys.  
703 Med. Rehabil.* 90, 136–144. doi:10.1016/j.apmr.2008.07.014.
- 704 Hsiao, H., Knarr, B. A., Higginson, J. S., and Binder-macleod, S. A. (2015). Mechanisms  
705 to increase propulsive force for individuals poststroke. *J. Neuroeng. Rehabil.* 12, 1–  
706 8. doi:10.1186/s12984-015-0030-8.
- 707 Hsiao, H. Y., Zabielski, T. M., Palmer, J. A., Higginson, J. S., and Binder-Macleod, S. A.  
708 (2016). Evaluation of measurements of propulsion used to reflect changes in  
709 walking speed in individuals poststroke. *J. Biomech.* 49, 4107–4112.  
710 doi:10.1016/j.jbiomech.2016.10.003.
- 711 Iturralde, P. A., and Torres-Oviedo, G. (2019). Corrective Muscle Activity Reveals  
712 Subject-Specific Sensorimotor Recalibration. *Eneuro* 6, ENEURO.0358-18.2019.  
713 doi:10.1523/eneuro.0358-18.2019.
- 714 Johnson, A. T., Benhur Benjamin, M., and Silverman, N. (2002). Oxygen consumption,  
715 heat production, and muscular efficiency during uphill and downhill walking. *Appl.  
716 Ergon.* 33, 485–491. doi:10.1016/S0003-6870(02)00031-5.
- 717 Jørgensen, H. S., Nakayama, H., Raaschou, H. O., and Olsen, T. S. (1995). Recovery of  
718 walking function in stroke patients: the Copenhagen Stroke Study. *Arch. Phys. Med.  
719 Rehabil.* 76, 27–32. Available at: <http://www.ncbi.nlm.nih.gov/pubmed/7811170>.

- 720 Jørgensen, L., Crabtree, N. J., Reeve, J., and Jacobsen, B. K. (2000). Ambulatory level  
721 and asymmetrical weight bearing after stroke affects bone loss in the upper and  
722 lower part of the femoral neck differently: Bone adaptation after decreased  
723 mechanical loading. *Bone* 27, 701–707. doi:10.1016/S8756-3282(00)00374-4.
- 724 Kautz, S. A., Duncan, P. W., Perera, S., Neptune, R. R., and Studenski, S. A. (2005).  
725 Coordination of hemiparetic locomotion after stroke rehabilitation. *Neurorehabil.*  
726 *Neural Repair* 19, 250–258. doi:10.1177/1545968305279279.
- 727 Kesar, T. M., Reisman, D. S., Perumal, R., Jancosko, A. M., Higginson, J. S., Rudolph,  
728 K. S., et al. (2011). Combined effects of fast treadmill walking and functional  
729 electrical stimulation on post-stroke gait. *Gait Posture* 33, 309–313.  
730 doi:10.1016/j.gaitpost.2010.11.019.
- 731 Kesar, T. M., Sauer, M. J., Binder-Macleod, S. A., and Reisman, D. S. (2014). Motor  
732 learning during poststroke gait rehabilitation: A case study. *J. Neurol. Phys. Ther.*  
733 38, 183–189. doi:10.1097/NPT.0000000000000047.
- 734 Kloter, E., Wirz, M., and Dietz, V. (2011). Locomotion in stroke subjects: Interactions  
735 between unaffected and affected sides. *Brain* 134, 721–731.  
736 doi:10.1093/brain/awq370.
- 737 Kwakkel, G., Veerbeek, J. M., van Wegen, E. E. H., and Wolf, S. L. (2015). Constraint-  
738 induced movement therapy after stroke. *Lancet Neurol.* 14, 224–234.  
739 doi:10.1016/S1474-4422(14)70160-7.
- 740 Larish, D. D., Martin, P. E., and Mungiole, M. (1988). Characteristic Patterns of Gait in  
741 the Healthy Old. *Ann. N. Y. Acad. Sci.* 515, 18–32. doi:10.1111/j.1749-  
742 6632.1988.tb32960.x.

- 743 Lay, A. N., Hass, C. J., and Gregor, R. J. (2006). The effects of sloped surfaces on  
744 locomotion: A kinematic and kinetic analysis. *J. Biomech.* 39, 1621–1628.  
745 doi:10.1016/j.jbiomech.2005.05.005.
- 746 Lay, A. N., Hass, C. J., Nichols, T. R., and Gregor, R. J. (2007). The effects of sloped  
747 surfaces on locomotion: An electromyographic analysis. *J. Biomech.* 40, 1276–1285.  
748 doi:10.1016/j.jbiomech.2006.05.023.
- 749 Leech, K. A., Roemmich, R. T., Day, K. A., and Bastian, A. J. (2018). Movement and  
750 perception recalibrate differently across multiple days of locomotor learning. *J.*  
751 *Neurophysiol.* 114, 608–623. doi:10.1152/jn.00628.2014.
- 752 Leroux, A., Fung, J., and Barbeau, H. (2002). Postural adaptation to walking on inclined  
753 surfaces: I. Normal strategies. *Gait Posture* 15, 64–74.
- 754 Lewek, M. D., Braun, C. H., and Wutzke, C. (2018). The role of movement errors in  
755 modifying spatiotemporal gait asymmetry post stroke: a randomized controlled trial.  
756 *Clin. Rehabil.* 32, 161–172. doi:10.1177/0269215517723056.
- 757 Malone, L. A., and Bastian, A. J. (2014). Spatial and Temporal Asymmetries in Gait  
758 Predict Split-Belt Adaptation Behavior in Stroke. *Neurorehabil. Neural Repair* 28,  
759 230–240. doi:10.1177/1545968313505912.
- 760 Den Otter, A. R., Geurts, A. C. H., Mulder, T. H., and Duysens, J. (2006). Gait recovery  
761 is not associated with changes in the temporal patterning of muscle activity during  
762 treadmill walking in patients with post-stroke hemiparesis. *Clin. Neurophysiol.* 117,  
763 4–15.
- 764 Patterson, K. K., Nadkarni, N. K., Black, S. E., and McIlroy, W. E. (2012). Gait  
765 symmetry and velocity differ in their relationship to age. *Gait Posture* 35, 590–594.

- 766 doi:10.1016/j.gaitpost.2011.11.030.
- 767 Reisman, D. S., Block, H. J., Bastian, A. J., Darcy, S., Block, H. J., and Bastian, A. J.  
768 (2005). Interlimb coordination during locomotion: what can be adapted and stored?  
769 *J. Neurophysiol.* 94, 2403–15. doi:10.1152/jn.00089.2005.
- 770 Reisman, D. S., McLean, H., Keller, J., Danks, K. A., and Bastian, A. J. (2013). Repeated  
771 split-belt treadmill training improves poststroke step length asymmetry.  
772 *Neurorehabil. Neural Repair* 27, 460–468. doi:10.1177/1545968312474118.
- 773 Reisman, D. S., Wityk, R., Silver, K., and Bastian, A. J. (2007). Locomotor adaptation on  
774 a split-belt treadmill can improve walking symmetry post-stroke. *Brain* 130, 1861–  
775 72. doi:10.1093/brain/awm035.
- 776 Reisman, D. S., Wityk, R., Silver, K., and Bastian, A. J. (2009). Split-belt treadmill  
777 adaptation transfers to overground walking in persons poststroke. *Neurorehabil.*  
778 *Neural Repair* 23, 735–744. doi:10.1177/1545968309332880.
- 779 Rikli, R. E., and Jones, C. J. (1998). The reliability and validity of a 6-minute walk test as  
780 a measure of physical endurance in older adults. *J. Aging Phys. Act.* 6, 363–375.
- 781 Sánchez, N., Simha, S. N., Donelan, J. M., and Finley, J. M. (2019). Taking advantage of  
782 external mechanical work to reduce metabolic cost: the mechanics and energetics of  
783 split-belt treadmill walking. *J. Physiol.* 15, JP277725. doi:10.1113/JP277725.
- 784 Selinger, J. C., Shawn, M., Connor, O., Wong, J. D., Maxwell, J., Selinger, J. C., et al.  
785 (2015). Humans Can Continuously Optimize Energetic Cost during Walking Report  
786 Humans Can Continuously Optimize Energetic Cost during Walking. *Curr. Biol.* 25,  
787 2452–2456. doi:10.1016/j.cub.2015.08.016.
- 788 Silver, K., Macko, R., Forrester, L., Goldberg, A., and Smith, G. (2000). Effects of

789 aerobic treadmill training on gait velocity, cadence, and gait symmetry in chronic  
790 hemiparetic stroke: a preliminary report. *Neurorehabil. Neural Repair* 14, 65–71.

791 Sombric, C. J., Calvert, J. S., and Torres-Oviedo, G. (2019). Large propulsion demands  
792 increase locomotor learning at the expense of step length symmetry. in *Frontiers in*  
793 *Physiology* doi:10.3389/fphys.2019.00060.

794 Sombric, C. J., Harker, H. M., Sparto, P. J., and Torres-oviedo, G. (2017). Explicit  
795 Action Switching Interferes with the Context-Specificity of Motor Memories in  
796 Older Adults. *Front. Aging Neurosci.* 9, 40.

797 Yokoyama, H., Sato, K., Ogawa, T., Yamamoto, S.-I., Nakazawa, K., and Kawashima, N.  
798 (2018). Characteristics of the gait adaptation process due to split-belt treadmill  
799 walking under a wide range of right-left speed ratios in humans. *PLoS One* 13,  
800 e0194875. doi:10.1371/journal.pone.0194875.

801
